# Supplementary material for: Neoantigen-specific CD4+ T-cell response is critical for the therapeutic efficacy of cryo-thermal therapy
Source: PubMed Central journal article supplement — J Immunother Cancer. 2020 Sep 16;8(2):e000421. doi: 10.1136/jitc-2019-000421 (PMC7497524; doi:10.1136/jitc-2019-000421), 2020-09-16
Supplement: jitc-2019-000421supp001.pdf [file jitc-2019-000421supp001.pdf]

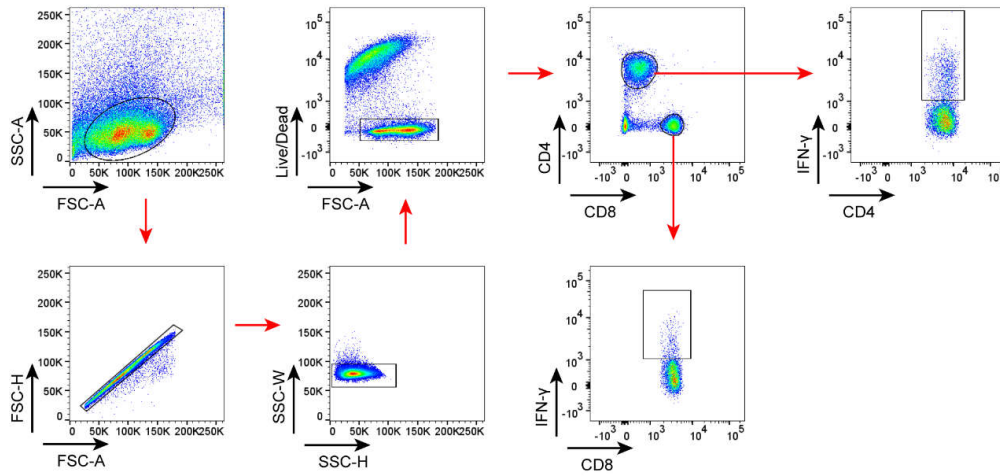

**Figure S1.** Gating strategy of flow cytometry for intracellular staining. Percentages of IFN- $\gamma$ <sup>+</sup> among CD4<sup>+</sup> T cells and IFN- $\gamma$ <sup>+</sup> among CD8<sup>+</sup> T cells analysed in this article.

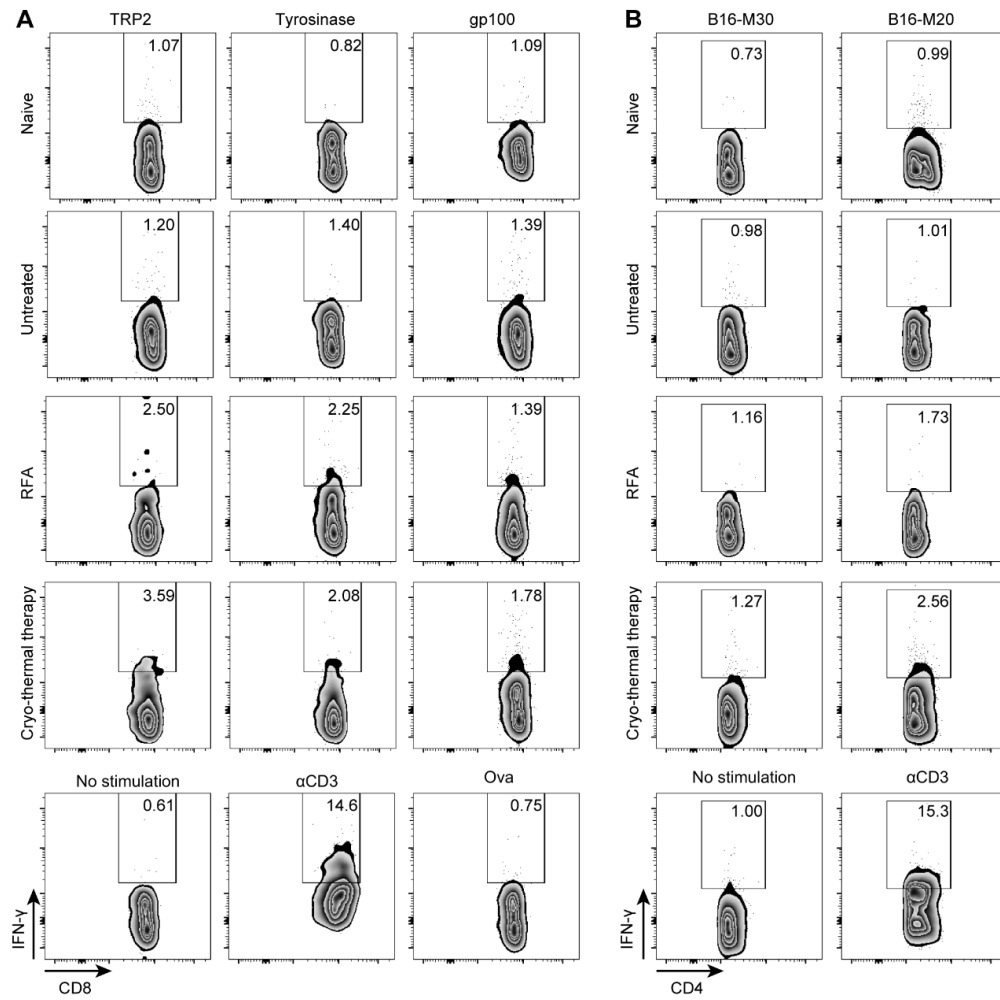

**Figure S2.** Represented flow cytometry graph of IFN- $\gamma^+$  cells in CD8 $^+$  T cells and CD4 $^+$  T cells in Figure 2. Cells were gated on CD8 $^+$  T cells (A) or CD4 $^+$  T cells (B).

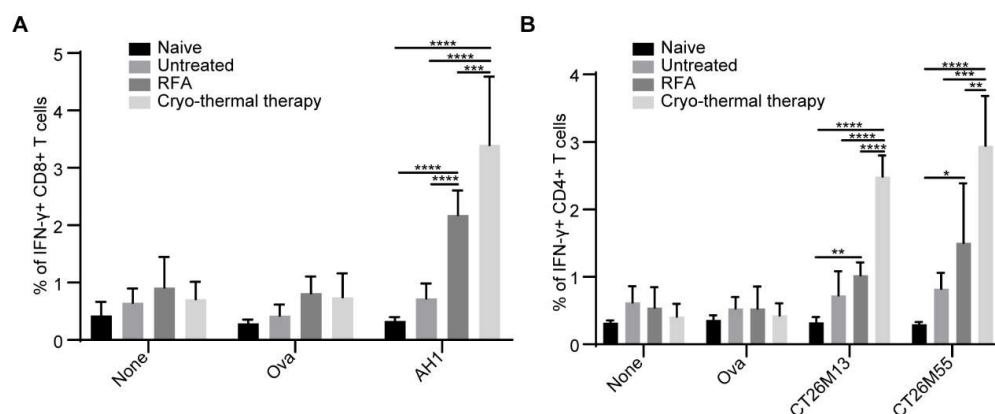

**Figure S3.** Frequency of IFN- $\gamma$ <sup>+</sup> cells in CD8<sup>+</sup> and CD4<sup>+</sup> T cells. On day 14 after RFA or cryo-thermal therapy, splenocytes were obtained from naïve mice, untreated mice and treated mice in CT26 model. (A) Each  $1 \times 10^5$  splenocytes were co-incubated with 10 $\mu$ g/ml AH1, Ova (negative control), and medium (blank control) respectively to measure IFN- $\gamma$ <sup>+</sup> CD8<sup>+</sup> T cells. AH1<sub>6-14</sub> is the H2-Ld-restricted epitope which is expressed in CT26. (B) Each  $1 \times 10^5$  splenocytes were co-incubated with 10 $\mu$ g/ml CT26M13, CT26M55, and medium (blank control) respectively to measure IFN- $\gamma$ <sup>+</sup> CD4<sup>+</sup> T cells. CT26M13 and CT26M55 are two neoepitopes found in CT26. Mean percentages of IFN- $\gamma$ <sup>+</sup> CD8<sup>+</sup> T cells (A) and IFN- $\gamma$ <sup>+</sup> CD4<sup>+</sup> T cells (B) in each group were shown (data for bar graphs were calculated using two-way ANOVA, \* $P < 0.05$ , \*\* $P < 0.01$ , \*\*\* $P < 0.001$ , \*\*\*\* $P < 0.0001$ ),  $n = 4$  for each group.

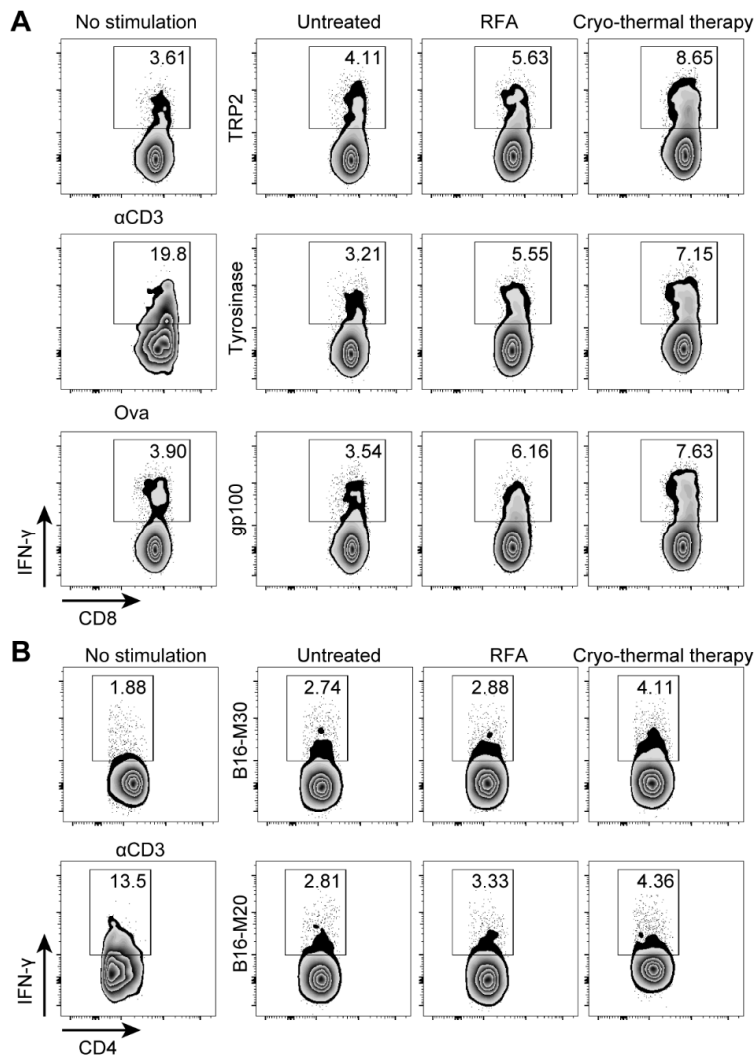

**Figure S4.** Represented flow cytometry graph of IFN- $\gamma$ <sup>+</sup> cells in CD8<sup>+</sup> T cells and CD4<sup>+</sup> T cells after expansion in Figure 3. Cells were gated on CD8<sup>+</sup> T cells (A) or CD4<sup>+</sup> T cells (B).

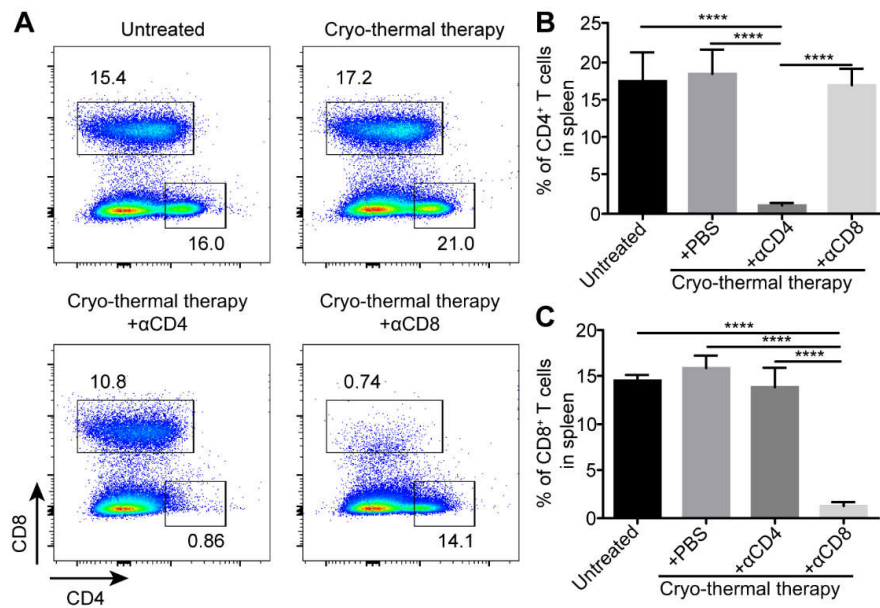

**Figure S5.** Consequent of depletion of CD8<sup>+</sup> T cells or CD4<sup>+</sup> T cells. (A) Represented flow cytometry graph of the frequency of CD8<sup>+</sup> T cells and CD4<sup>+</sup> T cells in each group. (B) Quantitative statistics of frequency CD4<sup>+</sup> T cells. (C) Quantitative statistics of frequency of CD8<sup>+</sup> T cells. All data were shown as mean ± SD. n = 4 per group. \*\*P < 0.01, \*\*\*\*P < 0.0001. Data for graphs were calculated using one-way ANOVA.

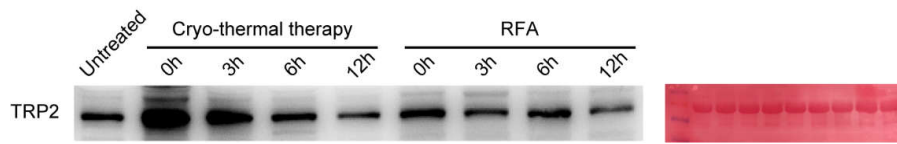

**Figure S6.** Western blot of TRP2 in tumour interstitial fluid. Tumours were harvested at 0, 3, 6, 12, and 24 hour after treatments. Left: Western blot analysis of released TRP2 in tumour interstitial fluid from different treatments (tumour-bearing untreated group; cryo-thermal group; RFA group). Right: Ponceaux staining of quantifying the same amount of proteins of 50  $\mu$ g in all the samples.

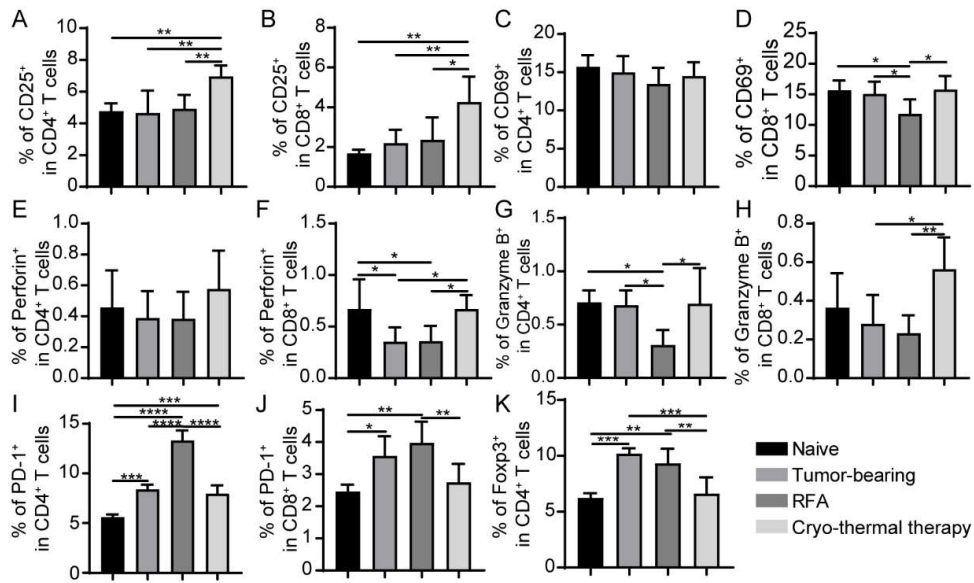

**Figure S7.** Frequency of CD25<sup>+</sup>, CD69<sup>+</sup>, perforin<sup>+</sup>, granzyme B<sup>+</sup>, PD-1<sup>+</sup> cells in CD8<sup>+</sup> and CD4<sup>+</sup> T cells (A-J) and foxp3<sup>+</sup> in CD4<sup>+</sup> T cells (K). On day 14 after RFA or cryo-thermal therapy, splenocytes were obtained from naïve mice, untreated mice and treated mice to analyse by flow cytometry.
